# Supplementary material
Source: PubMed Central journal article supplement (PMC6417933)
Supplement: NIHMS1521309-supplement-314316_ONLINE.pdf [file NIHMS1521309-supplement-314316_ONLINE.pdf]

## Supplemental Material

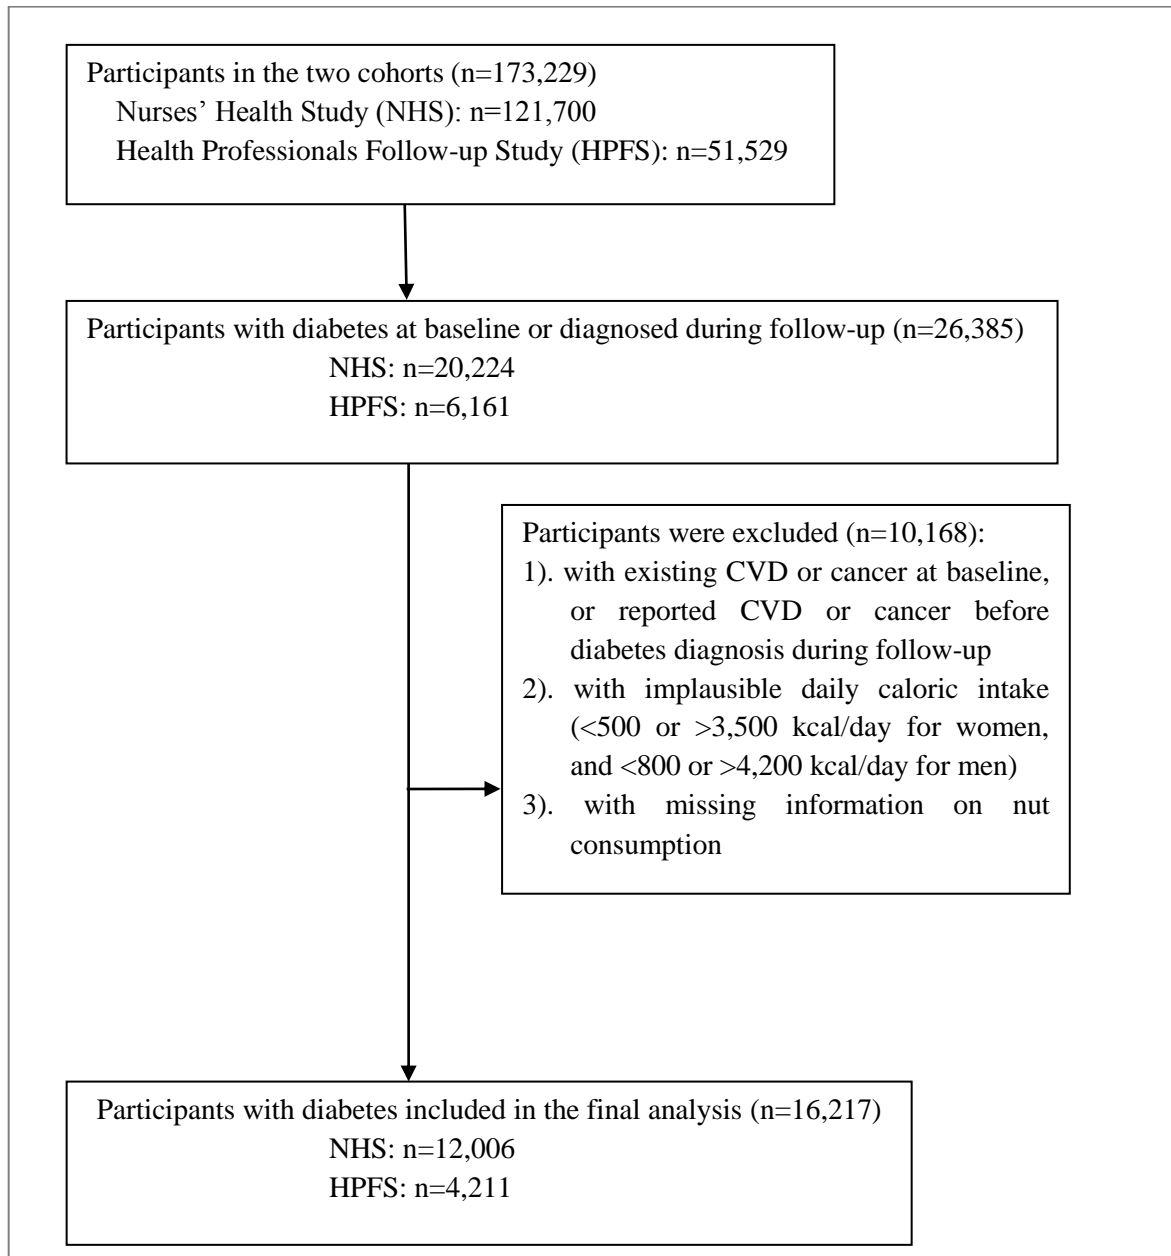

**Online Figure I.** Flowchart of participants with diabetes included in the analysis

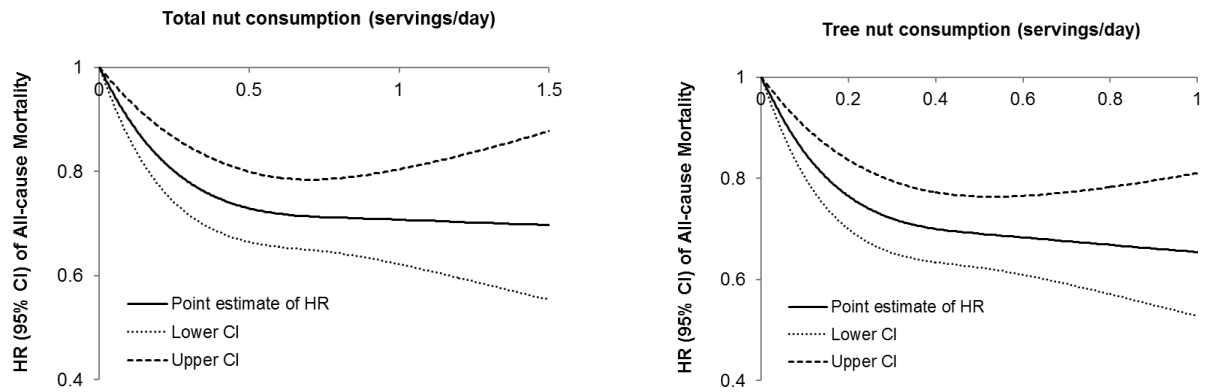

**Online Figure II.** Associations between total and tree nut consumption and all-cause mortality\*

\* Hazard ratios were adjusted for age (continuous), diabetes duration (years), sex (men or women), Caucasian (yes/no), BMI at diabetes diagnosis (<23.0, 23.0-24.9, 25.0-29.9, 30.0-34.9,  $\geq 35.0$  kg/m<sup>2</sup>), physical activity (<3.0, 3.0-8.9, 9.0-17.9, 18.0-26.9,  $\geq 27.0$  MET-hours/week), smoking status (never, past, current 1-14 cigarettes/day, current  $\geq 15$  cigarettes/day), alcohol consumption (0, 0.1-4.9, 5.0-14.9,  $\geq 15.0$  g/day), family history of MI or cancer (yes/no), current aspirin use (yes/no), presence of hypertension (yes/no), use of lipid-lowering medication (yes/no), diabetes medication use (insulin, oral medication, or others), and intake of total energy, red or processed meat, fruits, and vegetables (all in quartiles). Both *P* for non-linearity were <0.001.

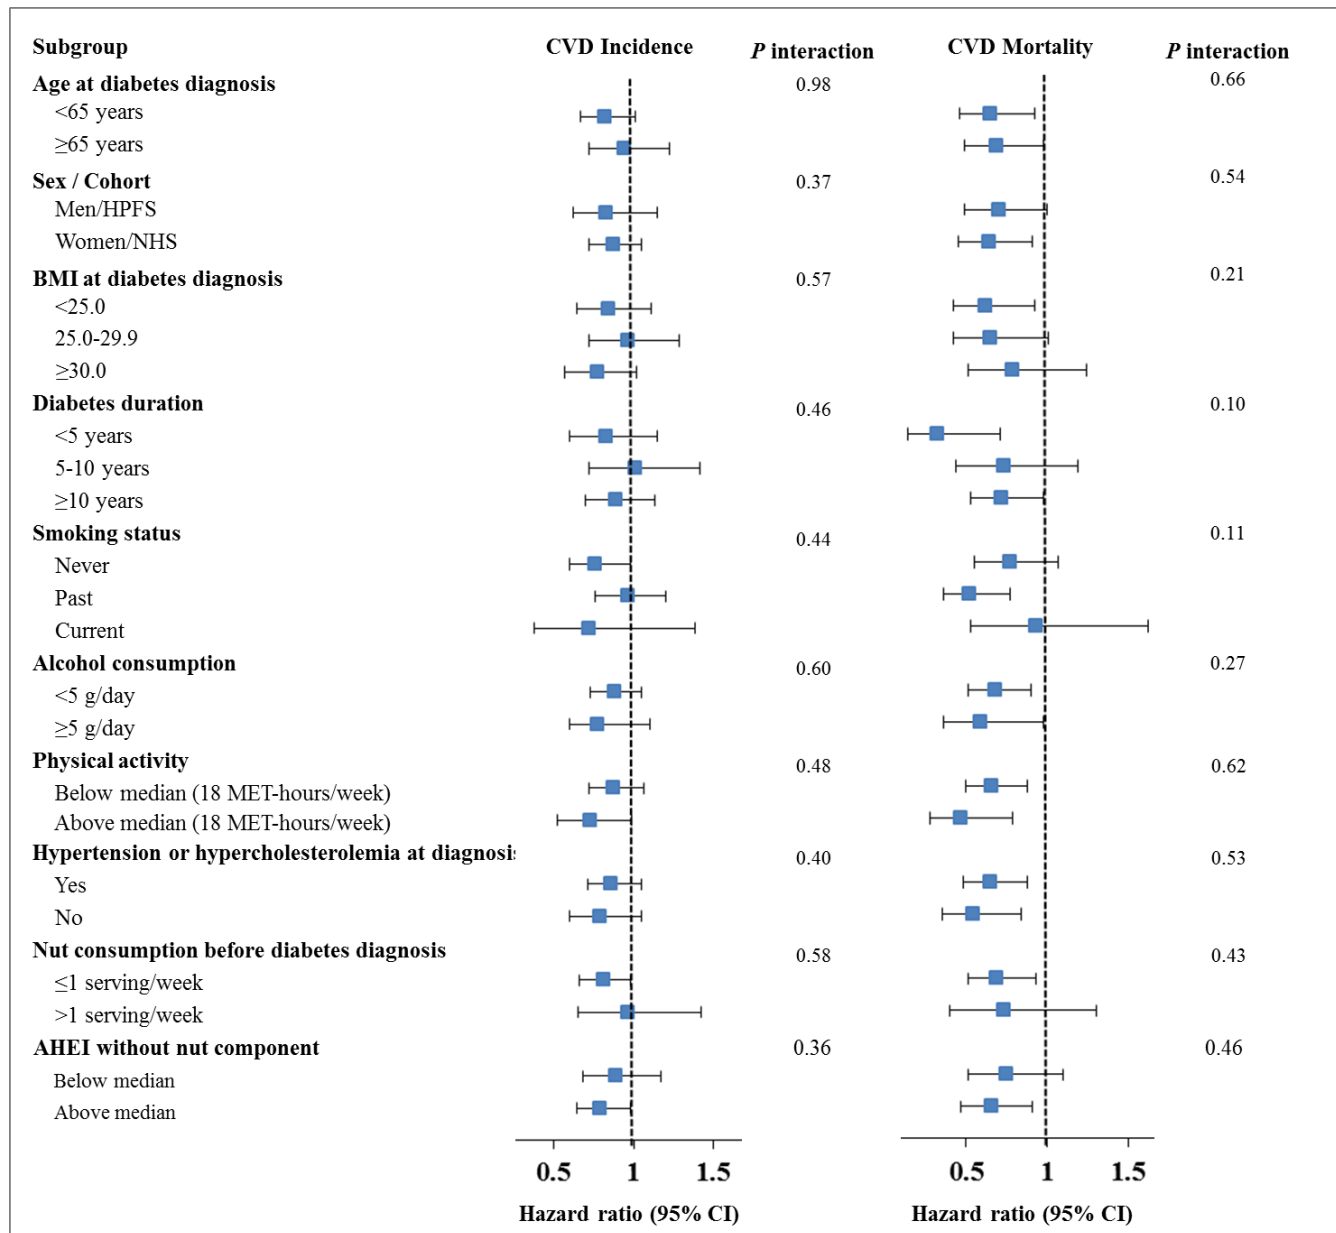

**Online Figure III.** Hazard ratios (95% CIs) of CVD incidence and CVD mortality according to total nut consumption after diabetes diagnosis in subgroups\*

\* Multivariable analyses were adjusted for age (continuous), diabetes duration (years), sex (men or women), Caucasian (yes/no), BMI at diabetes diagnosis (<23.0, 23.0-24.9, 25.0-29.9, 30.0-34.9,  $\geq 35.0$  kg/m<sup>2</sup>), physical activity (<3.0, 3.0-8.9, 9.0-17.9, 18.0-26.9,  $\geq 27.0$  MET-hours/week), smoking status (never, past, current 1-14 cigarettes/day, current  $\geq 15$  cigarettes/day), alcohol consumption (0, 0.1-4.9, 5.0-14.9,  $\geq 15.0$  g/day), current aspirin use (yes/no), family history of MI or cancer (yes/no), presence of hypertension (yes/no), use of lipid-lowering medication (yes/no), diabetes medication use (insulin, oral medication, or others), and intake of total energy, red or processed meat, fruits, and vegetables (all in quartiles). Stratifying variables were not included in the model when analyses were stratified by these variables individually. AHEI: Alternate Healthy Eating Index.

**Online Table I.** Partial Spearman correlation coefficients among types of nut consumption before and after diabetes diagnosis\*

|                           | Nut consumption after diabetes diagnosis |           |         |
|---------------------------|------------------------------------------|-----------|---------|
|                           | Total nuts                               | Tree nuts | Peanuts |
| After diabetes diagnosis  |                                          |           |         |
| Total nuts                | 1.00                                     | ----      | ----    |
| Tree nuts                 | 0.80**                                   | 1.00      | ----    |
| Peanuts                   | 0.75**                                   | 0.42**    | 1.00    |
| Before diabetes diagnosis |                                          |           |         |
| Total nuts                | 0.39**                                   | 0.33**    | 0.34**  |
| Tree nuts                 | 0.30**                                   | 0.39**    | 0.22**  |
| Peanuts                   | 0.33**                                   | 0.22**    | 0.43**  |

\* Adjusted for age, diabetes duration, sex, ethnicity, BMI at diabetes diagnosis, physical activity, smoking status, alcohol consumption, family history of MI or cancer, current aspirin use, total energy intake, and AHEI excluding nuts. \*\*  $P < 0.001$ .

**Online Table II.** Hazard ratios (95% CIs) of CVD incidence and mortality according to total nut consumption after diabetes diagnosis using the average of last two FFQs\*

|                                               | <b>Total Nut Consumption</b> |                   |                   |                   |                   | <i>P</i> trend |
|-----------------------------------------------|------------------------------|-------------------|-------------------|-------------------|-------------------|----------------|
|                                               | <1 serving/month             | <1 serving/week   | 1 serving/week    | 2-4 servings/week | ≥5 servings/week  |                |
| <b>CVD Incidence</b>                          |                              |                   |                   |                   |                   |                |
| <b>Total CVD Incidence</b>                    |                              |                   |                   |                   |                   |                |
| Age-adjusted model                            | 1.00                         | 0.91 (0.84, 1.00) | 0.99 (0.90, 1.10) | 0.73 (0.65, 0.82) | 0.74 (0.63, 0.87) | <0.001         |
| Multivariable model                           | 1.00                         | 0.96 (0.88, 1.05) | 1.06 (0.95, 1.18) | 0.81 (0.72, 0.91) | 0.84 (0.71, 1.00) | 0.01           |
| <b>CHD Incidence</b>                          |                              |                   |                   |                   |                   |                |
| Age-adjusted model                            | 1.00                         | 0.89 (0.80, 0.98) | 0.95 (0.84, 1.06) | 0.67 (0.59, 0.76) | 0.67 (0.56, 0.81) | <0.001         |
| Multivariable model                           | 1.00                         | 0.92 (0.83, 1.02) | 1.00 (0.89, 1.13) | 0.74 (0.65, 0.85) | 0.78 (0.64, 0.94) | <0.001         |
| <b>Stroke Incidence</b>                       |                              |                   |                   |                   |                   |                |
| Age-adjusted model                            | 1.00                         | 1.01 (0.84, 1.22) | 1.14 (0.93, 1.40) | 0.93 (0.75, 1.17) | 0.96 (0.71, 1.32) | 0.64           |
| Multivariable model                           | 1.00                         | 1.08 (0.89, 1.31) | 1.24 (1.00, 1.54) | 1.04 (0.82, 1.31) | 1.07 (0.77, 1.48) | 0.85           |
| <b>All-Cause and Cause-Specific Mortality</b> |                              |                   |                   |                   |                   |                |
| <b>CVD Mortality</b>                          |                              |                   |                   |                   |                   |                |
| Age-adjusted model                            | 1.00                         | 0.72 (0.63, 0.82) | 0.69 (0.59, 0.80) | 0.54 (0.46, 0.63) | 0.45 (0.35, 0.57) | <0.001         |
| Multivariable model                           | 1.00                         | 0.87 (0.77, 1.00) | 0.87 (0.74, 1.02) | 0.75 (0.63, 0.89) | 0.65 (0.51, 0.83) | <0.001         |
| <b>Cancer Mortality</b>                       |                              |                   |                   |                   |                   |                |
| Age-adjusted model                            | 1.00                         | 0.76 (0.66, 0.88) | 0.68 (0.57, 0.81) | 0.73 (0.62, 0.86) | 0.62 (0.49, 0.79) | <0.001         |
| Multivariable model                           | 1.00                         | 0.82 (0.70, 0.95) | 0.73 (0.61, 0.88) | 0.82 (0.69, 0.98) | 0.69 (0.54, 0.89) | 0.01           |
| <b>All-Cause Mortality</b>                    |                              |                   |                   |                   |                   |                |
| Age-adjusted model                            | 1.00                         | 0.68 (0.63, 0.73) | 0.61 (0.56, 0.66) | 0.54 (0.50, 0.59) | 0.46 (0.40, 0.51) | <0.001         |
| Multivariable model                           | 1.00                         | 0.84 (0.78, 0.90) | 0.78 (0.71, 0.85) | 0.76 (0.70, 0.83) | 0.66 (0.58, 0.74) | <0.001         |

\* Multivariable analyses were adjusted for age (continuous), diabetes duration (years), sex (men or women), Caucasian (yes/no), BMI at diabetes diagnosis (<23.0, 23.0-24.9, 25.0-29.9, 30.0-34.9, ≥35.0 kg/m<sup>2</sup>), physical activity (<3.0, 3.0-8.9, 9.0-17.9, 18.0-26.9, ≥27.0 MET-hours/week), smoking status (never, past, current 1-14 cigarettes/day, current ≥15 cigarettes/day), alcohol consumption (0, 0.1-4.9, 5.0-14.9, ≥15.0 g/day), family history of MI or cancer (yes/no), current aspirin use (yes/no), presence of hypertension (yes/no), use of lipid-lowering medication (yes/no), diabetes medication use (insulin, oral medication, or others), and intake of total energy, red or processed meat, fruits, and vegetables (all in quartiles).

**Online Table III.** Hazard ratios (95% CIs) of CVD incidence and mortality according to total nut consumption after diabetes diagnosis with further adjustment in sensitivity analyses

|                                                                                                                         | <b>Total Nut Consumption</b> |                   |                   |                   |                   | <i>P</i> trend |
|-------------------------------------------------------------------------------------------------------------------------|------------------------------|-------------------|-------------------|-------------------|-------------------|----------------|
|                                                                                                                         | <1 serving/month             | <1 serving/week   | 1 serving/week    | 2-4 servings/week | ≥5 servings/week  |                |
| <b>Further adjustment for total intake of sodium and olive oil *</b>                                                    |                              |                   |                   |                   |                   |                |
| Total CVD Incidence                                                                                                     | 1.00                         | 1.05 (0.95, 1.16) | 1.10 (0.99, 1.22) | 0.93 (0.83, 1.04) | 0.84 (0.72, 0.99) | 0.01           |
| CHD Incidence                                                                                                           | 1.00                         | 1.04 (0.93, 1.17) | 1.06 (0.94, 1.20) | 0.86 (0.75, 0.98) | 0.81 (0.67, 0.98) | 0.008          |
| Stroke Incidence                                                                                                        | 1.00                         | 1.07 (0.87, 1.32) | 1.23 (0.98, 1.53) | 1.16 (0.92, 1.45) | 0.94 (0.68, 1.29) | 0.75           |
| CVD Mortality                                                                                                           | 1.00                         | 0.99 (0.86, 1.15) | 0.98 (0.83, 1.15) | 0.85 (0.72, 1.01) | 0.67 (0.52, 0.85) | <0.001         |
| Cancer Mortality                                                                                                        | 1.00                         | 0.95 (0.81, 1.12) | 0.94 (0.78, 1.13) | 0.92 (0.77, 1.09) | 0.87 (0.69, 1.09) | 0.12           |
| All-Cause Mortality                                                                                                     | 1.00                         | 0.90 (0.83, 0.98) | 0.88 (0.80, 0.96) | 0.80 (0.73, 0.87) | 0.69 (0.61, 0.79) | <0.001         |
| <b>Further adjustment for Alternate Healthy Eating Index without nut component instead of individual foods intake *</b> |                              |                   |                   |                   |                   |                |
| Total CVD Incidence                                                                                                     | 1.00                         | 1.05 (0.95, 1.16) | 1.10 (0.98, 1.22) | 0.94 (0.84, 1.05) | 0.86 (0.73, 1.02) | 0.04           |
| CHD Incidence                                                                                                           | 1.00                         | 1.04 (0.93, 1.16) | 1.06 (0.93, 1.19) | 0.87 (0.76, 0.99) | 0.83 (0.69, 1.00) | 0.02           |
| Stroke Incidence                                                                                                        | 1.00                         | 1.07 (0.87, 1.32) | 1.23 (0.99, 1.53) | 1.17 (0.93, 1.46) | 0.95 (0.69, 1.32) | 0.86           |
| CVD Mortality                                                                                                           | 1.00                         | 0.99 (0.86, 1.15) | 0.99 (0.84, 1.16) | 0.89 (0.75, 1.05) | 0.72 (0.56, 0.91) | 0.005          |
| Cancer Mortality                                                                                                        | 1.00                         | 0.96 (0.82, 1.13) | 0.95 (0.79, 1.14) | 0.94 (0.79, 1.12) | 0.88 (0.70, 1.11) | 0.29           |
| All-Cause Mortality                                                                                                     | 1.00                         | 0.92 (0.85, 0.99) | 0.91 (0.83, 0.99) | 0.84 (0.77, 0.92) | 0.74 (0.66, 0.84) | <0.001         |
| <b>Further adjustment for number of natural teeth *</b>                                                                 |                              |                   |                   |                   |                   |                |
| Total CVD Incidence                                                                                                     | 1.00                         | 1.04 (0.94, 1.15) | 1.08 (0.97, 1.21) | 0.91 (0.82, 1.03) | 0.84 (0.71, 0.98) | 0.01           |
| CHD Incidence                                                                                                           | 1.00                         | 1.03 (0.92, 1.15) | 1.04 (0.92, 1.18) | 0.84 (0.74, 0.96) | 0.81 (0.67, 0.97) | 0.006          |
| Stroke Incidence                                                                                                        | 1.00                         | 1.07 (0.86, 1.32) | 1.22 (0.98, 1.52) | 1.15 (0.92, 1.44) | 0.93 (0.68, 1.29) | 0.75           |
| CVD Mortality                                                                                                           | 1.00                         | 0.97 (0.84, 1.11) | 0.94 (0.80, 1.11) | 0.83 (0.70, 0.98) | 0.66 (0.52, 0.84) | <0.001         |
| Cancer Mortality                                                                                                        | 1.00                         | 0.93 (0.79, 1.10) | 0.91 (0.76, 1.09) | 0.90 (0.75, 1.07) | 0.84 (0.67, 1.06) | 0.15           |
| All-Cause Mortality                                                                                                     | 1.00                         | 0.89 (0.82, 0.97) | 0.87 (0.79, 0.95) | 0.79 (0.72, 0.86) | 0.69 (0.61, 0.78) | <0.001         |

\* Multivariable analyses were adjusted for age (continuous), diabetes duration (years), sex (men or women), Caucasian (yes/no), BMI at diabetes diagnosis (<23.0, 23.0-24.9, 25.0-29.9, 30.0-34.9, ≥35.0 kg/m<sup>2</sup>), physical activity (<3.0, 3.0-8.9, 9.0-17.9, 18.0-26.9, ≥27.0 MET-hours/week), smoking status (never, past, current 1-14 cigarettes/day, current ≥15 cigarettes/day), alcohol consumption (0, 0.1-4.9, 5.0-14.9, ≥15.0 g/day), family history of MI or cancer (yes/no), current aspirin use (yes/no), presence of hypertension (yes/no), use of lipid-lowering medication (yes/no), diabetes medication use (insulin, oral medication, or others), and intake of total energy, red or processed meat, fruits, and vegetables (all in quartiles).

**Online Table IV** Hazard ratios (95% CIs) of CVD incidence and mortality according to specific nut consumption after diabetes diagnosis with further mutually adjustment of types of nut intake\*

|                            | Specific Nut Consumption |                   |                   |                   | <i>P</i> trend |
|----------------------------|--------------------------|-------------------|-------------------|-------------------|----------------|
|                            | <1 serving/month         | <1 serving/week   | 1 serving/week    | ≥2 serving/week   |                |
| <b>Total CVD Incidence</b> |                          |                   |                   |                   |                |
| Tree nuts                  | 1.00                     | 1.04 (0.94, 1.14) | 0.90 (0.78, 1.03) | 0.79 (0.68, 0.92) | 0.001          |
| Peanuts                    | 1.00                     | 1.00 (0.90, 1.10) | 0.99 (0.86, 1.14) | 1.05 (0.91, 1.22) | 0.48           |
| <b>CHD Incidence</b>       |                          |                   |                   |                   |                |
| Tree nuts                  | 1.00                     | 1.01 (0.90, 1.13) | 0.85 (0.73, 1.00) | 0.75 (0.63, 0.89) | <0.001         |
| Peanuts                    | 1.00                     | 1.00 (0.89, 1.11) | 1.00 (0.85, 1.17) | 1.08 (0.91, 1.27) | 0.41           |
| <b>Stroke Incidence</b>    |                          |                   |                   |                   |                |
| Tree nuts                  | 1.00                     | 1.12 (0.91, 1.37) | 1.06 (0.81, 1.40) | 0.90 (0.67, 1.20) | 0.50           |
| Peanuts                    | 1.00                     | 0.98 (0.80, 1.20) | 0.97 (0.73, 1.30) | 1.00 (0.75, 1.35) | 0.91           |
| <b>CVD Mortality</b>       |                          |                   |                   |                   |                |
| Tree nuts                  | 1.00                     | 1.00 (0.86, 1.15) | 0.87 (0.71, 1.07) | 0.62 (0.49, 0.78) | <0.001         |
| Peanuts                    | 1.00                     | 0.93 (0.81, 1.07) | 0.87 (0.70, 1.08) | 0.98 (0.79, 1.21) | 0.79           |
| <b>Cancer Mortality</b>    |                          |                   |                   |                   |                |
| Tree nuts                  | 1.00                     | 0.98 (0.83, 1.16) | 0.87 (0.71, 1.08) | 0.75 (0.60, 0.93) | 0.009          |
| Peanuts                    | 1.00                     | 0.93 (0.79, 1.09) | 1.17 (0.94, 1.44) | 1.00 (0.80, 1.26) | 0.85           |
| <b>All-Cause Mortality</b> |                          |                   |                   |                   |                |
| Tree nuts                  | 1.00                     | 0.92 (0.85, 1.00) | 0.88 (0.79, 0.98) | 0.70 (0.62, 0.78) | <0.001         |
| Peanuts                    | 1.00                     | 0.91 (0.84, 0.99) | 0.99 (0.89, 1.11) | 0.93 (0.83, 1.05) | 0.25           |

\* Multivariable analyses were adjusted for age (continuous), diabetes duration (years), sex (men or women), Caucasian (yes/no), BMI at diabetes diagnosis (<23.0, 23.0-24.9, 25.0-29.9, 30.0-34.9, ≥35.0 kg/m<sup>2</sup>), physical activity (<3.0, 3.0-8.9, 9.0-17.9, 18.0-26.9, ≥27.0 MET-hours/week), smoking status (never, past, current 1-14 cigarettes/day, current ≥15 cigarettes/day), alcohol consumption (0, 0.1-4.9, 5.0-14.9, ≥15.0 g/day), family history of MI or cancer (yes/no), current aspirin use (yes/no), presence of hypertension (yes/no), use of lipid-lowering medication (yes/no), diabetes medication use (insulin, oral medication, or others), and intake of total energy, red or processed meat, fruits, and vegetables (all in quartiles). Tree nuts and peanut consumption were further mutually adjusted.



**Online Table V.** Hazard ratios (95% CIs) of all-cause and cause-specific mortality according to total nut consumption after diabetes diagnosis when deaths occurred within 4 years after diabetes diagnosis was excluded \*

|                            | <b>Total Nut Consumption</b> |                   |                   |                   |                   | <i>P</i> trend |
|----------------------------|------------------------------|-------------------|-------------------|-------------------|-------------------|----------------|
|                            | <1 serving/month             | <1 serving/week   | 1 serving/week    | 2-4 servings/week | ≥5 servings/week  |                |
| <b>CVD Mortality</b>       |                              |                   |                   |                   |                   |                |
| Age-adjusted model         | 1.00                         | 0.85 (0.73, 0.98) | 0.78 (0.67, 0.92) | 0.61 (0.51, 0.72) | 0.48 (0.38, 0.61) | <0.001         |
| Multivariable model        | 1.00                         | 0.98 (0.84, 1.13) | 0.94 (0.79, 1.11) | 0.84 (0.70, 1.00) | 0.68 (0.53, 0.87) | 0.001          |
| <b>Cancer Mortality</b>    |                              |                   |                   |                   |                   |                |
| Age-adjusted model         | 1.00                         | 0.84 (0.71, 1.00) | 0.83 (0.69, 1.00) | 0.75 (0.62, 0.90) | 0.71 (0.56, 0.90) | 0.003          |
| Multivariable model        | 1.00                         | 0.91 (0.76, 1.09) | 0.89 (0.73, 1.08) | 0.87 (0.72, 1.06) | 0.83 (0.65, 1.05) | 0.13           |
| <b>All-Cause Mortality</b> |                              |                   |                   |                   |                   |                |
| Age-adjusted model         | 1.00                         | 0.73 (0.68, 0.80) | 0.68 (0.62, 0.75) | 0.55 (0.50, 0.60) | 0.47 (0.42, 0.54) | <0.001         |
| Multivariable model        | 1.00                         | 0.90 (0.83, 0.98) | 0.85 (0.77, 0.94) | 0.78 (0.71, 0.86) | 0.70 (0.61, 0.79) | <0.001         |

\* Multivariable analyses were adjusted for age (continuous), diabetes duration (years), sex (men or women), Caucasian (yes/no), BMI at diabetes diagnosis (<23.0, 23.0-24.9, 25.0-29.9, 30.0-34.9, ≥35.0 kg/m<sup>2</sup>), physical activity (<3.0, 3.0-8.9, 9.0-17.9, 18.0-26.9, ≥27.0 MET-hours/week), smoking status (never, past, current 1-14 cigarettes/day, current ≥15 cigarettes/day), alcohol consumption (0, 0.1-4.9, 5.0-14.9, ≥15.0 g/day), family history of MI or cancer (yes/no), current aspirin use (yes/no), presence of hypertension (yes/no), use of lipid-lowering medication (yes/no), diabetes medication use (insulin, oral medication, or others), and intake of total energy, red or processed meat, fruits, and vegetables (all in quartiles).
